# Supplementary material for: Organoruthenium Complexes with Benzo-Fused Pyrithiones Overcome Platinum Resistance in Ovarian Cancer Cells
Source: MDPI journal article supplement (doi:10.3390/cancers13102493), 2021-05-20
Supplement: s1 [file s1]

# Supplementary Materials: Organoruthenium Complexes with Benzo-fused Pyrithiones Overcome Platinum Resistance in Ovarian Cancer Cells

Jerneja Kladnik, James P. C. Coverdale, Jakob Kljun, Hilke Burmeister, Petra Lippman, Francesca G. Ellis, Alan M. Jones, Ingo Ott, Isolda Romero-Canelón and Iztok Turel

## 1. Syntheses of organic ligands and organoruthenium(II) complexes

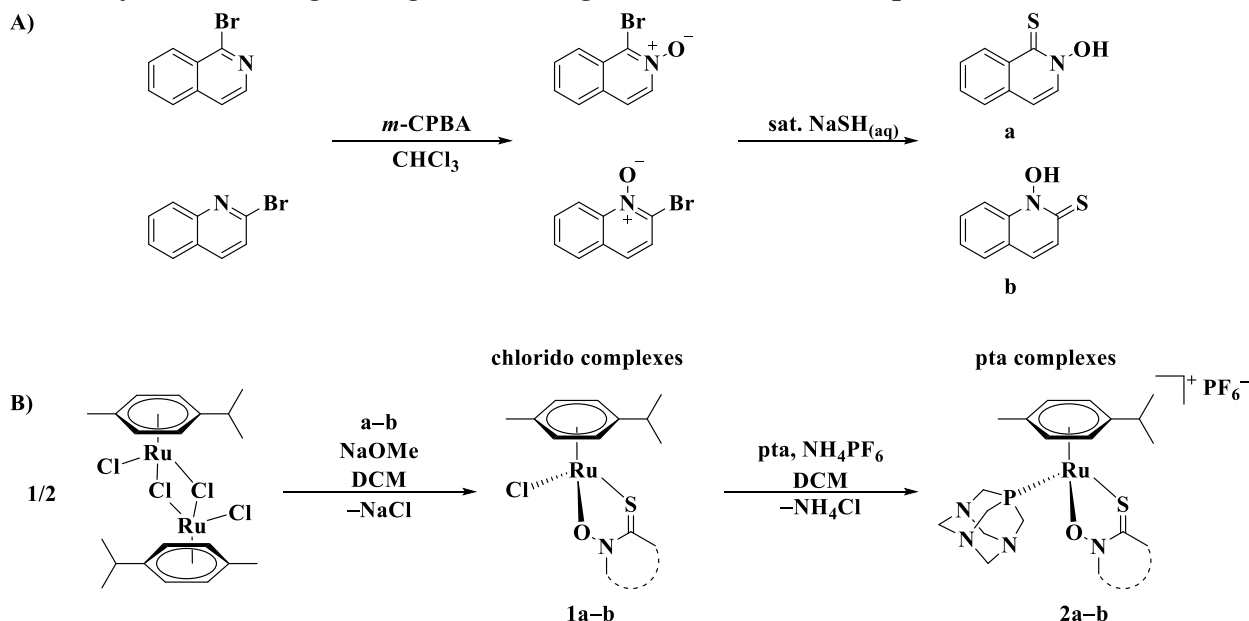

Figure S1. General scheme of (A) prepared ligands **a–b** and (B) their organoruthenium (II) chlorido **1a–b** and pta **2a–b** complexes.

## 2. Single crystal X-ray diffraction

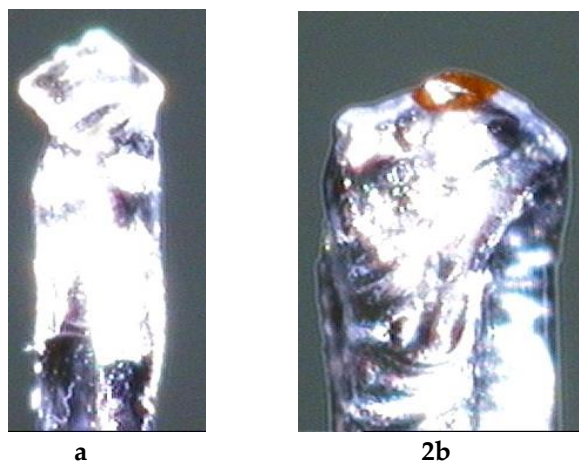

Figure S2. Photos of single crystals for ligand **a** (left) and pta complex **2b** (right).

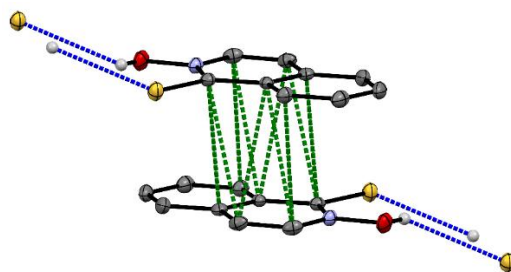

**Figure S3.** Packing of molecules of ligand **a**. Hydrogen bonds are drawn in blue, while green dotted lines connect carbon atoms with interatomic distance between 3.4 Å and 3.6 Å.

**Table S1.** Crystallographic data for ligand **a** and complex **2b**.

| Compound                                    | <b>a</b>                                                            | <b>2b</b>                                                                         |
|---------------------------------------------|---------------------------------------------------------------------|-----------------------------------------------------------------------------------|
| Empirical formula                           | C <sub>9</sub> H <sub>7</sub> NOS                                   | C <sub>25</sub> H <sub>32</sub> F <sub>6</sub> N <sub>4</sub> OP <sub>2</sub> RuS |
| Formula weight                              | 177.22                                                              | 713.61                                                                            |
| Temperature/K                               | 150                                                                 | 150                                                                               |
| Crystal system                              | triclinic                                                           | monoclinic                                                                        |
| Space group                                 | P-1                                                                 | P2 <sub>1</sub> /n                                                                |
| a/Å                                         | 6.8320(5)                                                           | 9.9036(3)                                                                         |
| b/Å                                         | 7.2558(5)                                                           | 17.4561(7)                                                                        |
| c/Å                                         | 8.6697(7)                                                           | 16.2456(6)                                                                        |
| $\alpha$ /°                                 | 71.325(7)                                                           | 90                                                                                |
| $\beta$ /°                                  | 77.248(7)                                                           | 103.713(4)                                                                        |
| $\gamma$ /°                                 | 82.763(6)                                                           | 90                                                                                |
| Volume/Å <sup>3</sup>                       | 396.39(5)                                                           | 2728.45(18)                                                                       |
| Z                                           | 2                                                                   | 4                                                                                 |
| $\rho_{\text{calc}}$ g cm <sup>-3</sup>     | 1.485                                                               | 1.737                                                                             |
| $\mu$ /mm <sup>-1</sup>                     | 0.349                                                               | 0.838                                                                             |
| F(000)                                      | 184.0                                                               | 1448.0                                                                            |
| Crystal size/mm <sup>3</sup>                | 0.2×0.2×0.03                                                        | 0.1×0.05×0.03                                                                     |
| Radiation                                   | MoK $\alpha$<br>( $\lambda$ = 0.71073)                              | MoK $\alpha$<br>( $\lambda$ = 0.71073)                                            |
| Reflections collected                       | 3225                                                                | 23073                                                                             |
| Independent reflections                     | 1814<br>[R <sub>int</sub> = 0.0225,<br>R <sub>sigma</sub> = 0.0399] | 6237<br>[R <sub>int</sub> = 0.0431,<br>R <sub>sigma</sub> = 0.0434]               |
| Data/restraints/parameters                  | 1814/0/110                                                          | 6237/0/364                                                                        |
| Goodness-of-fit on F <sup>2</sup>           | 1.081                                                               | 1.030                                                                             |
| Final R indexes<br>[I ≥ 2 $\sigma$ (I)]     | R <sub>1</sub> = 0.0390,<br>wR <sub>2</sub> = 0.0896                | R <sub>1</sub> = 0.0329,<br>wR <sub>2</sub> = 0.0639                              |
| Final R indexes<br>[all data]               | R <sub>1</sub> = 0.0516,<br>wR <sub>2</sub> = 0.0973                | R <sub>1</sub> = 0.0497,<br>wR <sub>2</sub> = 0.0685                              |
| Largest diff. peak/hole / e Å <sup>-3</sup> | 0.39/-0.20                                                          | 0.75/-0.48                                                                        |

### 3. NMR stability spectra

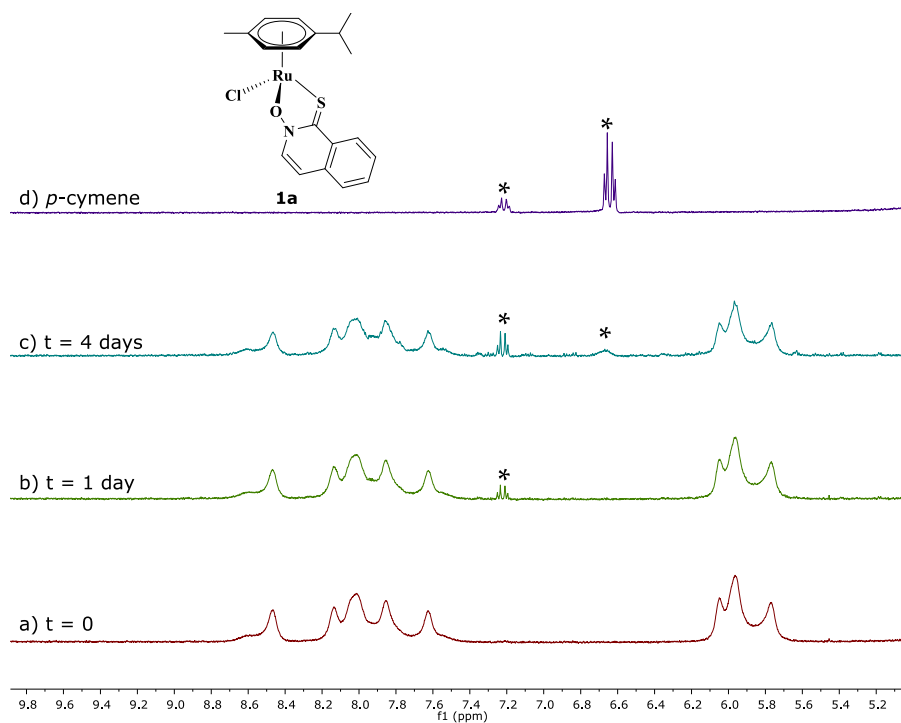

**Figure S4.**  $^1\text{H}$  NMR spectra of organoruthenium (II) chlorido complex **1a** in 5%  $(\text{CD}_3)_2\text{SO}/\text{D}_2\text{O}$  containing 140 mM NaCl at the chosen timepoints (the release of  $p$ -cymene ring is labelled with an asterisk (\*)).

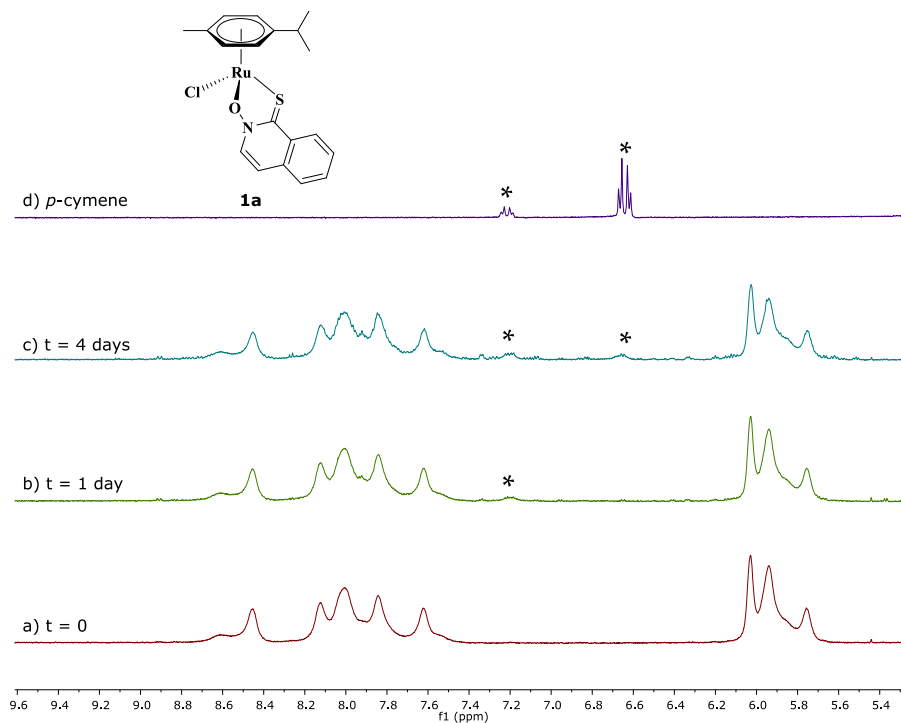

**Figure S5.**  $^1\text{H}$  NMR spectra of organoruthenium (II) chlorido complex **1a** in 5%  $(\text{CD}_3)_2\text{SO}/\text{D}_2\text{O}$  without NaCl at the chosen timepoints (the release of  $p$ -cymene ring is labelled with an asterisk (\*)).

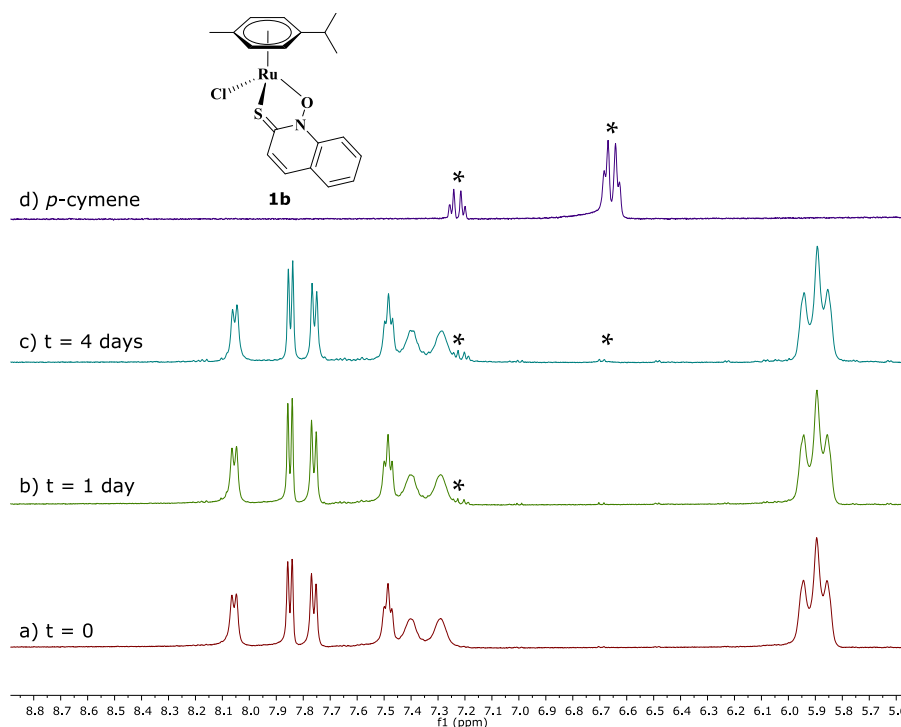

**Figure S6.**  $^1\text{H}$  NMR spectra of organoruthenium (II) chlorido complex **1b** in 5%  $(\text{CD}_3)_2\text{SO}/\text{D}_2\text{O}$  containing 140 mM NaCl at the chosen timepoints (the release of *p*-cymene ring is labelled with an asterisk (\*)).

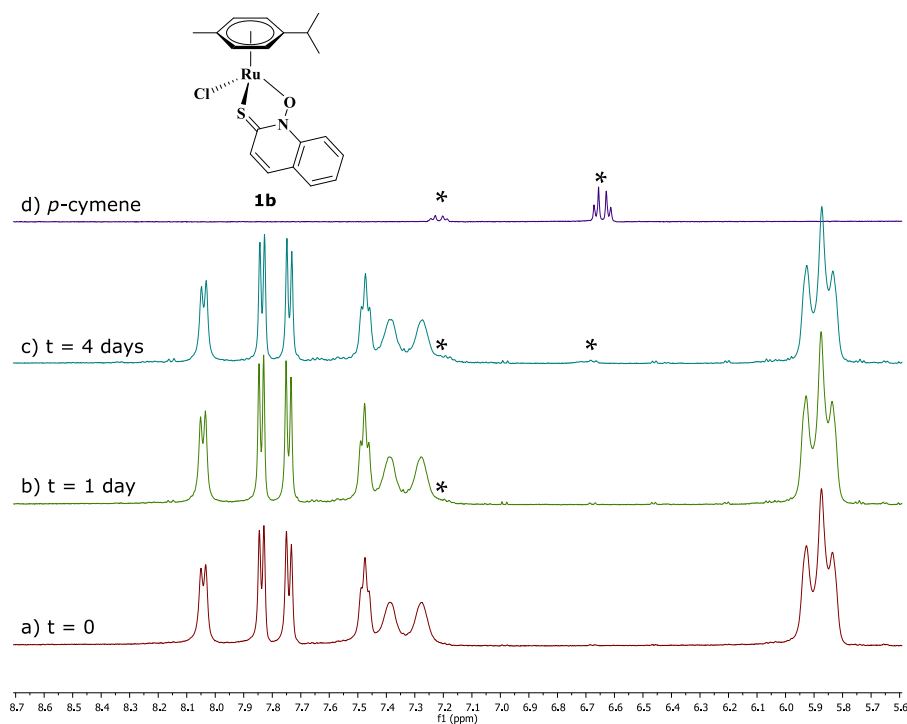

**Figure S7.**  $^1\text{H}$  NMR spectra of organoruthenium (II) chlorido complex **1b** in 5%  $(\text{CD}_3)_2\text{SO}/\text{D}_2\text{O}$  without NaCl at the chosen timepoints (the release of *p*-cymene ring is labelled with an asterisk (\*)).

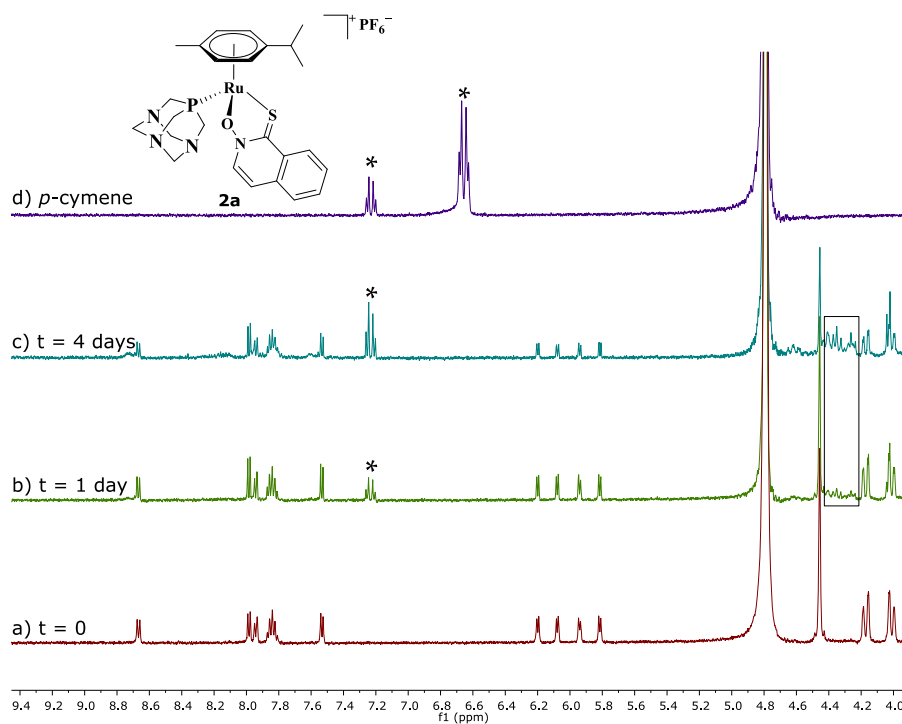

**Figure S8.**  $^1\text{H}$  NMR spectra of organoruthenium(II) pta complex **2a** in 5%  $(\text{CD}_3)_2\text{SO}/\text{D}_2\text{O}$  containing 140 mM NaCl at the chosen timepoints (the release of *p*-cymene ring is labelled with an asterisk (\*) and possible new phosphine species in a square).

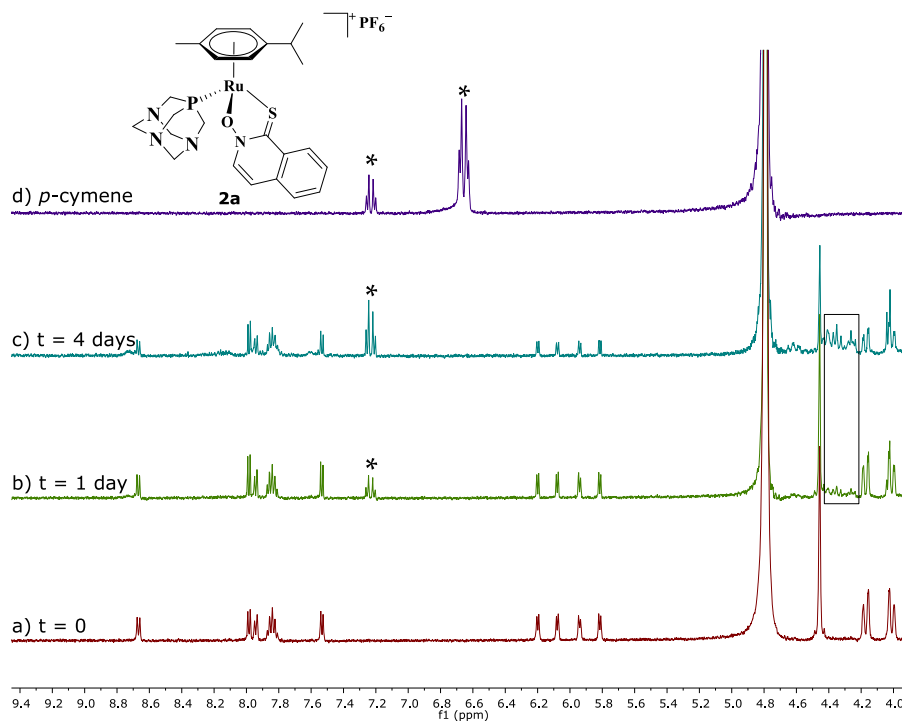

**Figure S9.**  $^1\text{H}$  NMR spectra of organoruthenium(II) pta complex **2a** in 5%  $(\text{CD}_3)_2\text{SO}/\text{D}_2\text{O}$  without NaCl at the chosen timepoints (the release of *p*-cymene ring is labelled with an asterisk (\*) and possible new phosphine species in a square).

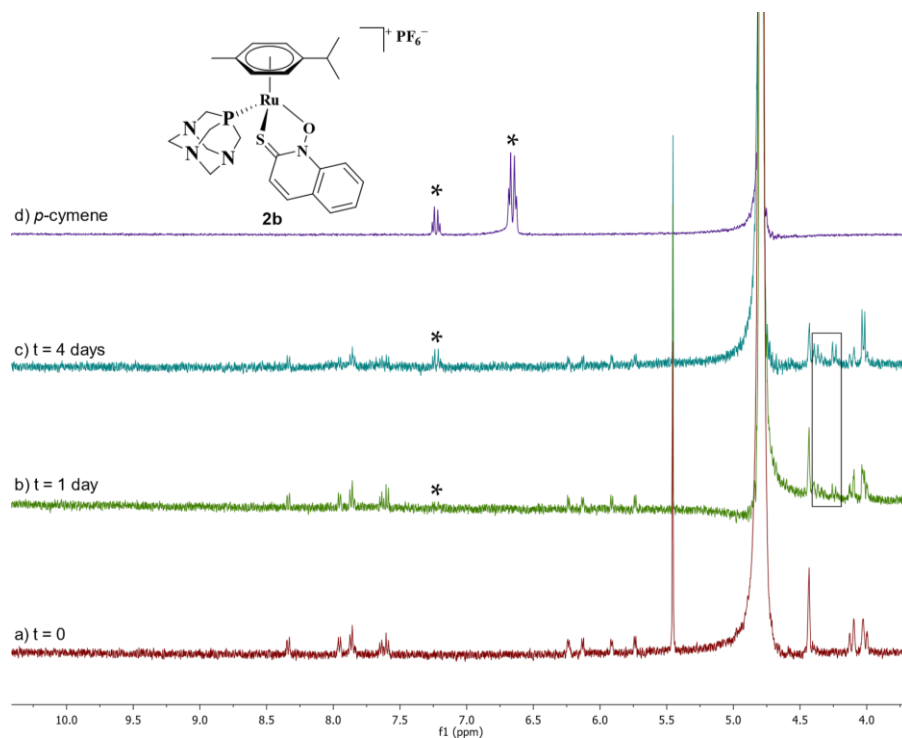

**Figure S10.**  $^1\text{H}$  NMR spectra of organoruthenium(II) pta complex **2b** in 5%  $(\text{CD}_3)_2\text{SO}/\text{D}_2\text{O}$  containing 140 mM NaCl at the chosen timepoints (the release of  $p$ -cymene ring is labelled with an asterisk (\*) and possible new phosphine species in a square).

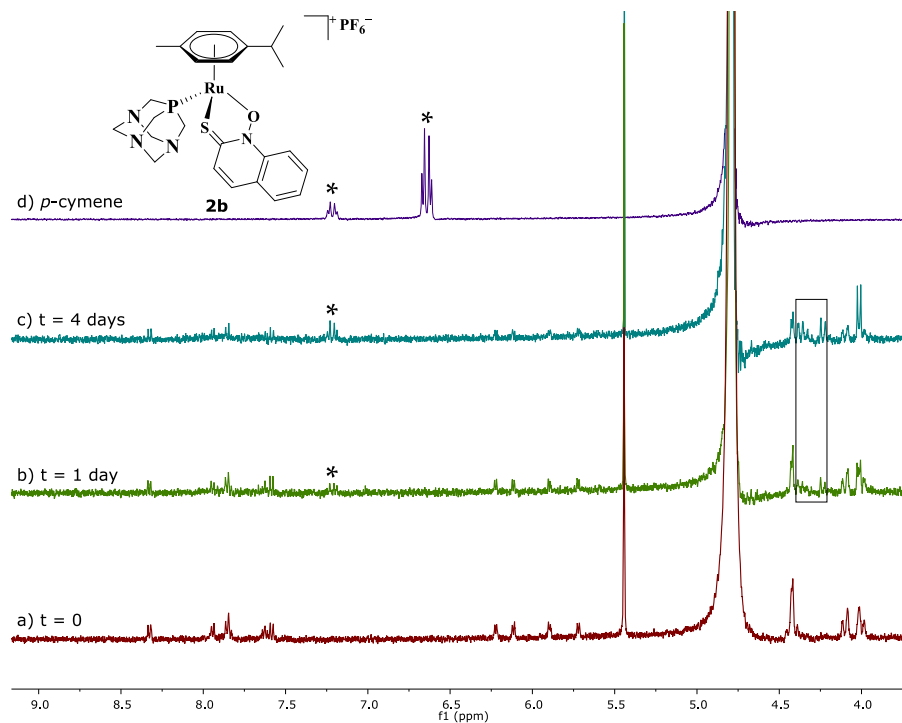

**Figure S11.**  $^1\text{H}$  NMR spectra of organoruthenium(II) pta complex **2b** in 5%  $(\text{CD}_3)_2\text{SO}/\text{D}_2\text{O}$  without NaCl at the chosen timepoints (the release of  $p$ -cymene ring is labelled with an asterisk (\*) and possible new phosphine species in a square).

#### 4. UV-Vis stability spectra

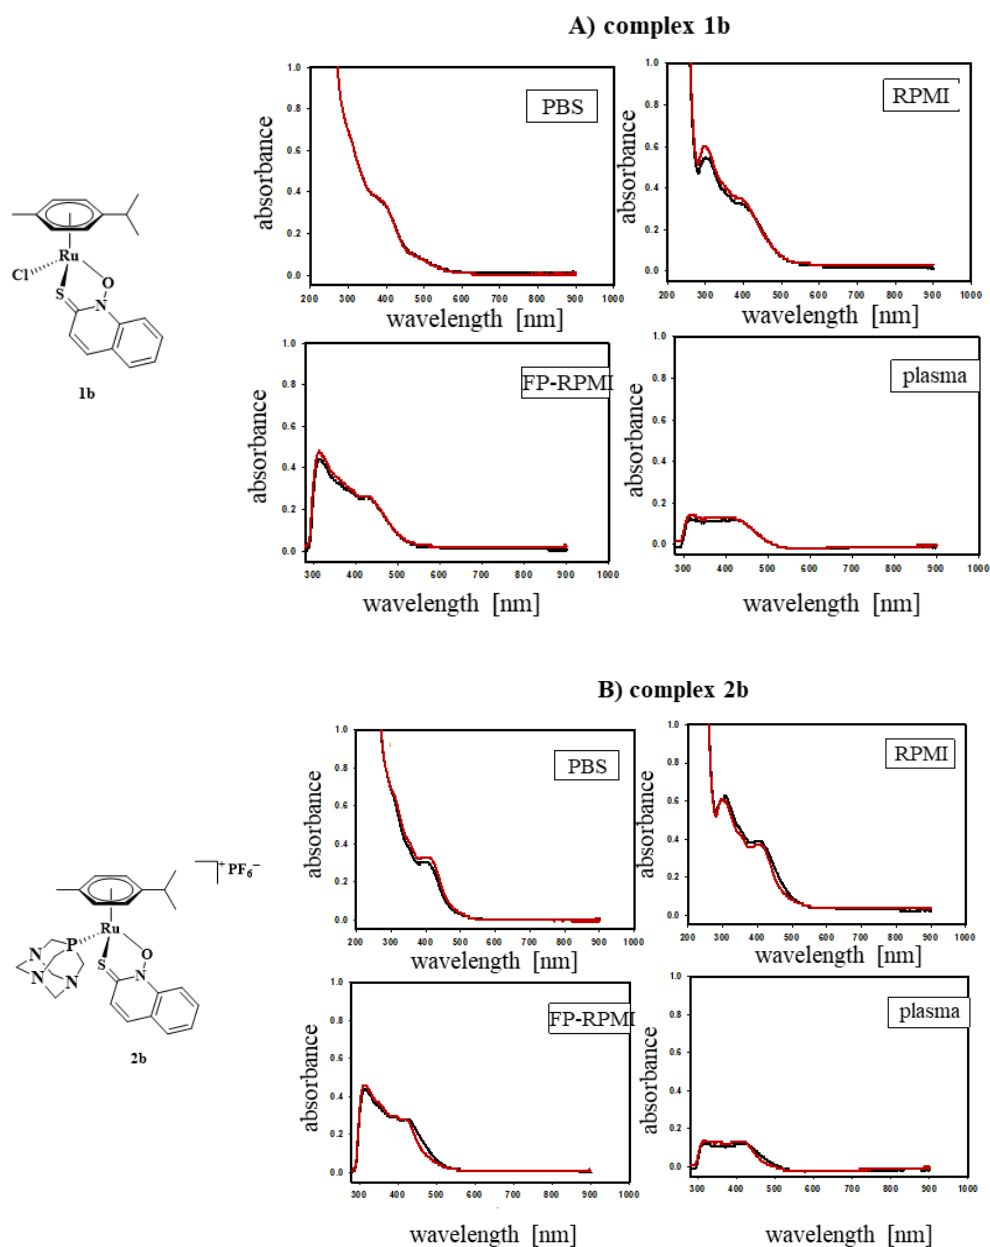

**Figure S12.** UV-Vis spectra of (A) organoruthenium (II) chlorido **1b** and (B) pta complex **2b** in PBS, RPMI-1640, FP-RPMI-1640 and human blood plasma recorded immediately after the preparation (black curve) and after 24 h (red curve).

## 5. NMR spectra of pta complexes 2a–b

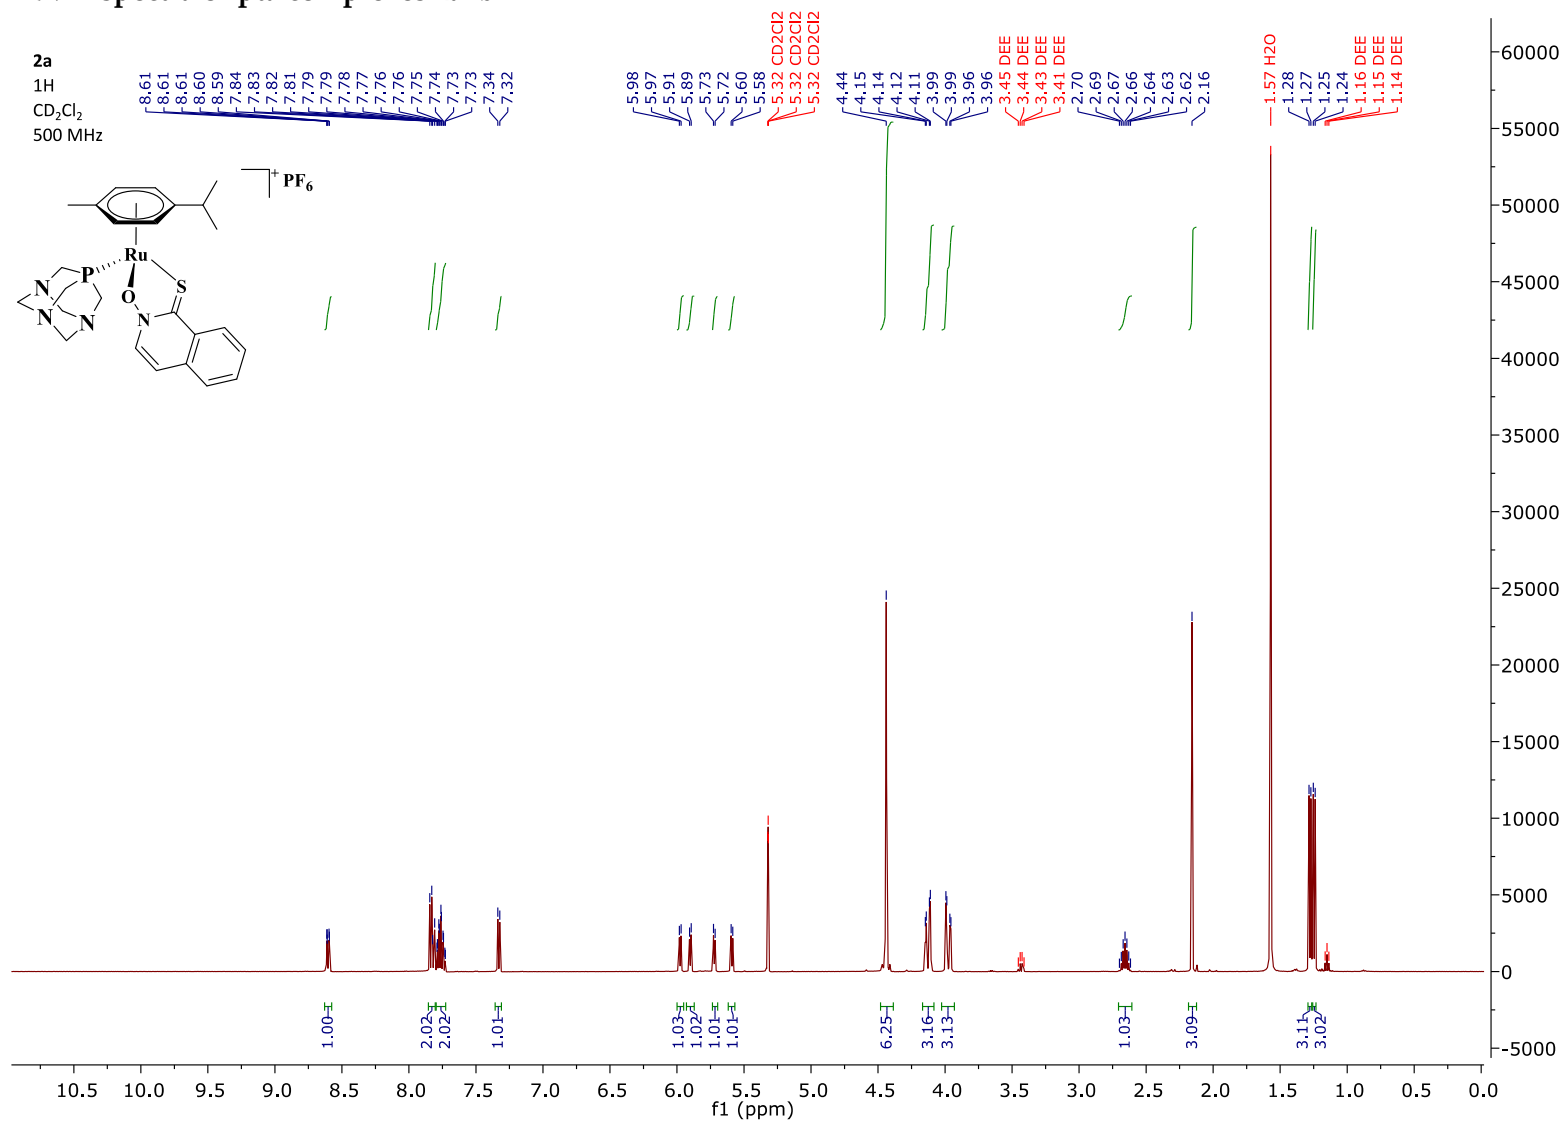

Figure S13.  $^1\text{H}$  NMR spectrum of **2a**.



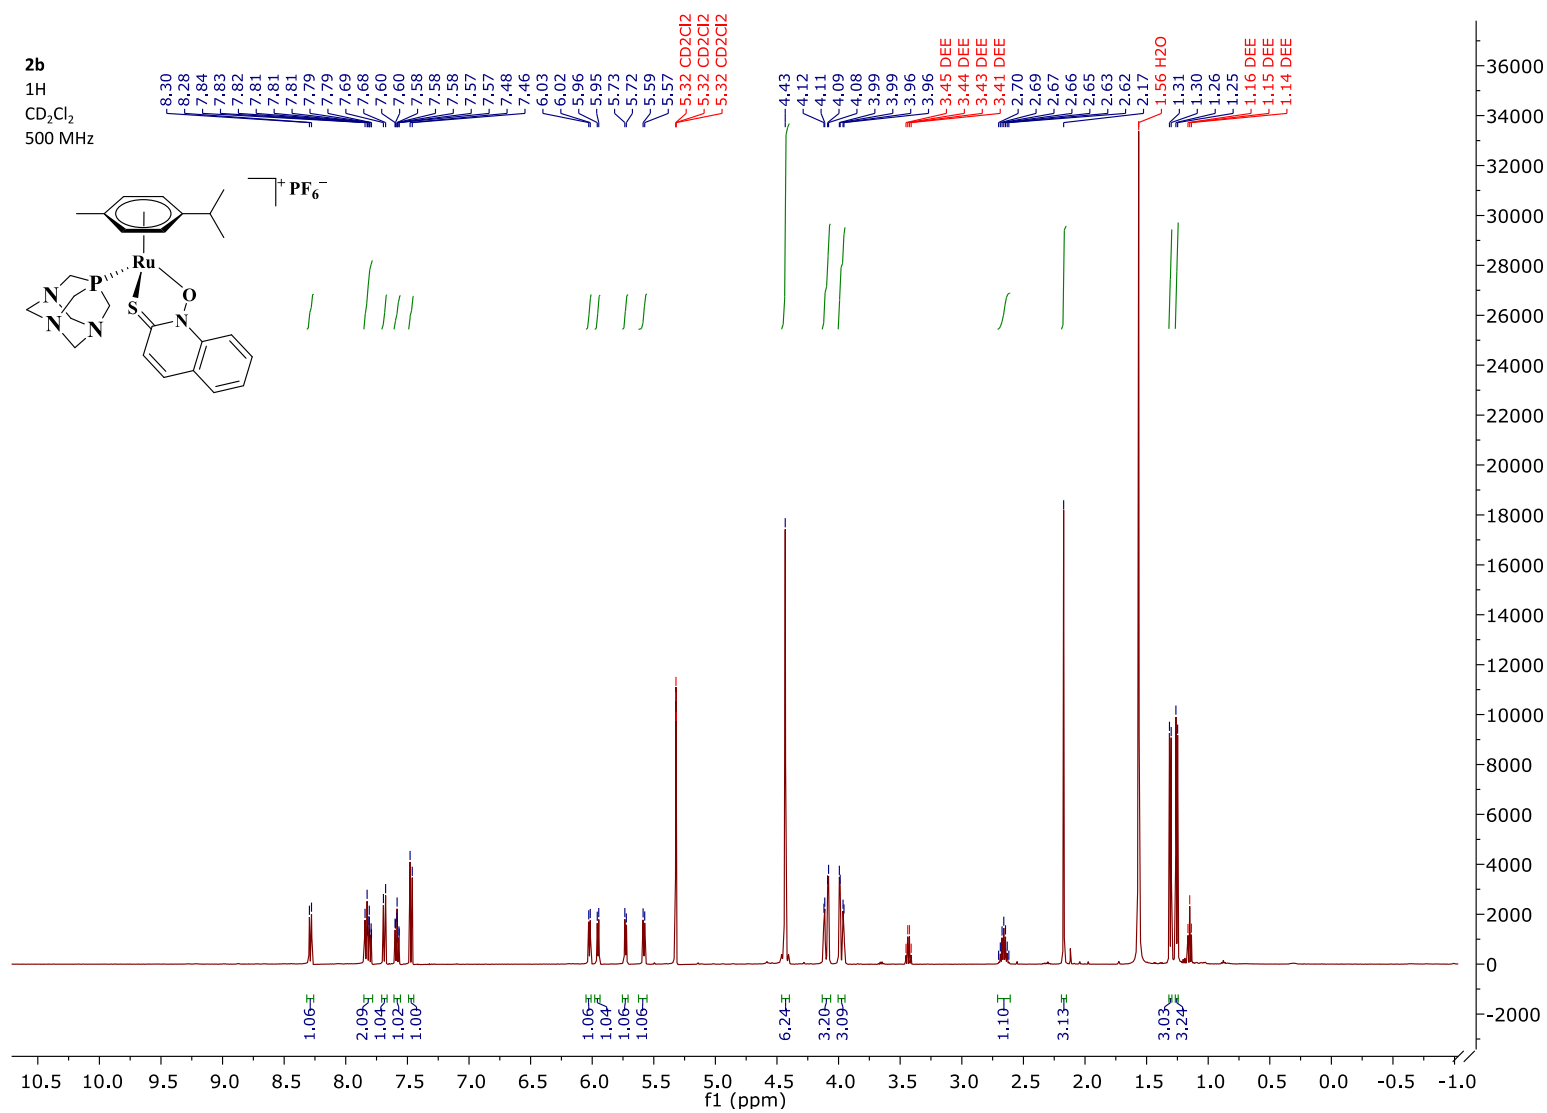

Figure S14.  $^1\text{H}$  NMR spectrum of **2b**.

## 6. Biological data

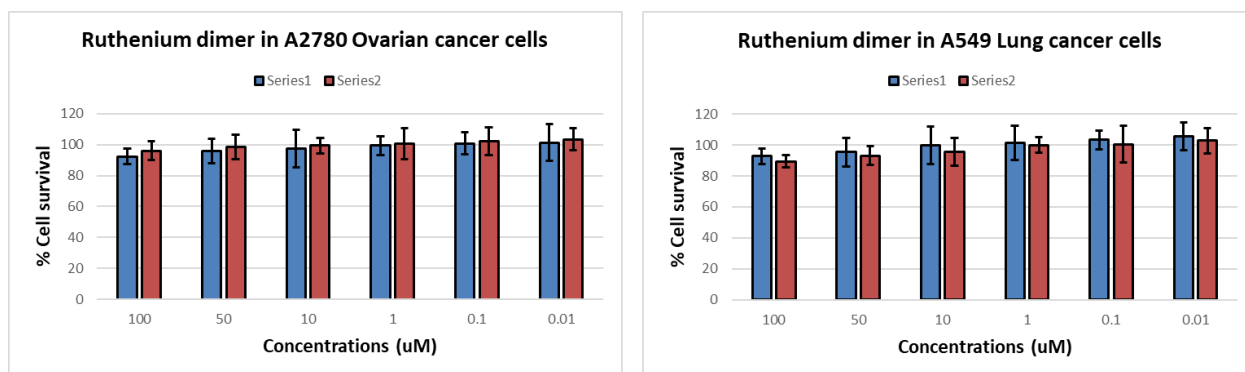

**Figure S15:** Antiproliferative activities of the ruthenium dimer precursor towards A2780 ovarian cancer cells and A549 lung cancer cells. Cellular viability determined using the MTT assay after 24 h drug exposure time at 37 °C and 72 h recovery in drug-free media. The dimer is inactive under the testing conditions in both cell lines. This is consistent with literature reports [1-5].

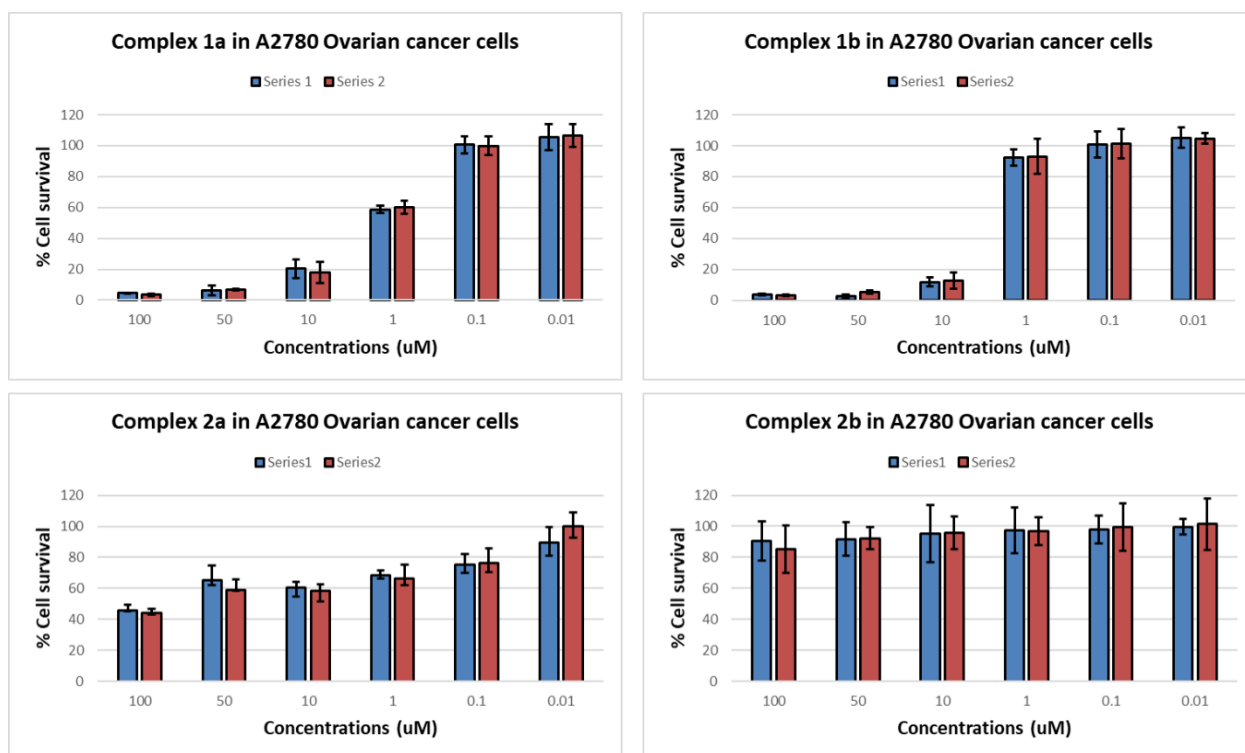

**Figure S16:** Antiproliferative activities of the prepared compounds towards A2780 ovarian cancer cells. Cellular viability determined using the MTT assay after 24 h drug exposure time at 37 °C and 72 h recovery in drug-free media. The graphs are examples of typical  $IC_{50}$  determination, in such case, experiments were carried out in duplicates (series 1 or 2) of triplicates (in each independent series). Sigmoidal curves were fitted from concentration in  $\mu$ M vs. cellular proliferation (%) as above, with inflection points reflecting the  $IC_{50}$  values reported.

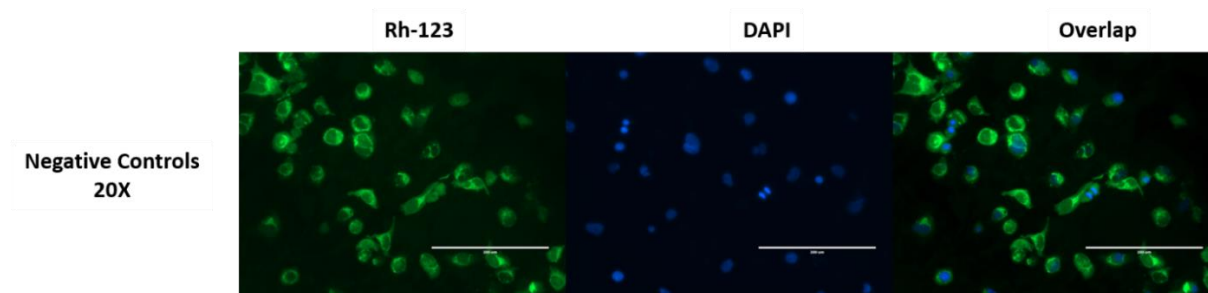

**Figure S17:** Negative controls for A2780 cancer cells stained with Rhodamine-123 (green) or DAPI (blue). Fluorescence measured using an EVOS fluorescence microscope using Rh-123 ( $\lambda_{\text{Ex}}$  511 nm;  $\lambda_{\text{Em}}$  534 nm) and DAPI ( $\lambda_{\text{Ex}}$  340 nm;  $\lambda_{\text{Em}}$  488 nm).

## References

1. Soldevila-Barreda, J.J.; Romero-Canelón, I.; Habtemariam, A.; Sadler, P.J. Transfer hydrogenation catalysis in cells as a new approach to anticancer drug design. *Nat. Commun.* **2015**, *6*, 6582, doi:10.1038/ncomms7582.
2. Namiecińska, E.; Sadowska, B.; Więckowska-Szakiel, M.; Dołęga, A.; Pasternak, B.; Grazul, M.; Budzisz, E. Anticancer and antimicrobial properties of novel  $\eta^6$ -*p*-cymene ruthenium(II) complexes containing a N,S-type ligand, their structural and theoretical characterization. *RSC Adv.* **2019**, *9*, 38629–38645, doi:10.1039/c9ra08736b.
3. Oehninger, L.; Stefanopoulou, M.; Alborzinia, H.; Schur, J.; Ludewig, S.; Namikawa, K.; Muñoz-Castro, A.; Köster, R.W.; Baumann, K.; Wölfl, S.; et al. Evaluation of arene ruthenium(II) *N*-heterocyclic carbene complexes as organometallics interacting with thiol and selenol containing biomolecules. *Dalton Trans.* **2013**, *42*, 1657–1666, doi:10.1039/c2dt32319b.
4. Demoro, B.; de Almeida, R.F.M.; Marques, F.; Matos, C.P.; Otero, L.; Pessoa, J.C.; Santos, I.; Rodriguez, A.; Moreno, V.; Lorenzo, J.; et al. Screening organometallic binuclear thiosemicarbazone ruthenium complexes as potential anti-tumour agents: cytotoxic activity and human serum albumin binding mechanism. *Dalton Trans.* **2013**, *42*, 7131–7146, doi:10.1039/c3dt00028a.
5. Mitra, R.; Das, S.; Shinde, S.V.; Sinha, S.; Somasundaram, K.; Samuelson, A.G. Anticancer activity of hydrogen-bond-stabilized half-sandwich  $\text{Ru}^{\text{II}}$  complexes with heterocycles. *Chem. Eur. J.* **2012**, *18*, 12278–12291, doi:10.1002/chem.201200938.
